# Supplementary material for: A Cu(i)-based Fenton-like agent inducing mitochondrial damage for photo-assisted enhanced chemodynamic therapy
Source: Royal Society of Chemistry journal article supplement (doi:10.1039/d3dt00317e), 2023-01-01
Supplement: d3dt00317e1.pdf [file d3dt00317e1.pdf]

## Supporting Information

### **Cu(I)-based Fenton-like agent inducing mitochondrial damage for photo-assisted enhanced chemodynamic therapy**

Zhaoguo Hong<sup>1</sup>, Jingjing Zhong<sup>1</sup>, Dangdang Ding<sup>1</sup>, Sihui Gong<sup>1</sup>, Liangliang Zhang<sup>1</sup>, Shulin Zhao<sup>1</sup>, Xing-Can Shen<sup>1</sup>, Hong Liang<sup>1</sup> and Fu-Ping Huang<sup>\*,1</sup>

<sup>1</sup>State Key Laboratory for Chemistry and Molecular Engineering of Medicinal Resources, School of Chemistry and Pharmaceutical Sciences, Guangxi Normal University, Guilin, 541004, P. R. China E-mail addresses: huangfp2010@163.com

## Experimental Section

### Materials

All of the chemicals and reagents employed in this work were used without further purification.  $\text{Cu}(\text{NO}_3)_2 \cdot 3\text{H}_2\text{O}$ , triphenylphosphine (TPP) oxalic dihydrazide, 4-dimethylaminocinnamaldehyde and methylene blue (MB) were purchased from Bide Pharmaceutical Technology Co. Ltd. (Shanghai, China). Annexin V-FITC/propidium iodide, Calcein-AM/propidium iodide (CA/PI) staining agents, 2',7'-dichlorodihydrofluorescein diacetate (DCFH-DA) and 5,5',6,6'-tetrachloro-1,1',3,3'-tetraethyl-benzimidazolylcarbocyanine iodide (JC-1) assay kit were purchased from Beyotime Biological Technology Co., Ltd. (Shanghai, China). MitoTracker Red CMXRos was obtained from Yeasen Biological Technology Co., Ltd. (Shanghai, China). SOSG (singlet oxygen sensor green) was purchased from Thermo Fischer Scientific (MA, USA). Hela cells were obtained directly from the cell bank of Shanghai Institute of Life Sciences (China) and cultured in Roswell Park Memorial Institute (RPMI) 1640 Medium which containing 10 % FBS (Gibco) plus 1 % penicillin.

### Instruments

Single crystal X-ray diffraction measurements were carried out using an XtaLAB Synergy-DS (Cu) X-ray Source ( $\lambda = 1.54184 \text{ \AA}$ ). Absorbance and fluorescence spectra were recorded on UV-vis spectrophotometer (UV-2600i, Shimadzu) and fluorometer (Cary Eclipse, Agilent Tech). Elemental analyses for C, H and N were recorded on a Perkin-Elmer 2400II elemental analyzer. Powder X-ray diffraction was measured on a Rigaku D/max diffractometer equipped (Cu-K $\alpha$ ,  $\lambda = 1.54056 \text{ \AA}$ ). XPS spectra were measured by Electron spectrometer ESCALAB 250Xi. EPR spectroscopy was conducted on A300 equipment (Bruker, GER). The inductively coupled plasma mass spectrometry (ICP-MS) data were obtained on a FLexar-NexION300X ICP-MS instrument (PerkinElmer Inc., USA).

### Synthesis of ligand DC-OD and DC-OD-Cu $[\text{Cu}_2(\text{DC-OD})(\text{PPh}_3)_4] \cdot 2\text{NO}_3 \cdot 2\text{CH}_3\text{OH}$

Ligand **DC-OD** was first obtained by refluxing 4-dimethylaminocinnamaldehyde and oxalyl dihydrazide in ethanol at a molar ratio of 2:1. For **DC-OD-Cu**, a mixture of **DC-OD** (43.2 mg, 0.1 mmol) and  $\text{PPh}_3$  (131 mg, 0.5 mmol) in 5 mL methanol was added to an aqueous solution of 5 mL  $\text{Cu}(\text{NO}_3)_2 \cdot 3\text{H}_2\text{O}$  (38.0 mg, 0.2 mmol) with stirring at room temperature for 30 min, then, the solution was cooled and filtered. Several days later, red block crystals of **DC-OD-Cu** suitable for X-ray structure analysis were crystallized from the solution after slow evaporation at room temperature, and collected by filtration, washed with ethanol and dried in air. Yield: 55 %. Elemental analysis data: calculated (%) for  $\text{C}_{98}\text{H}_{96}\text{Cu}_2\text{N}_8\text{O}_{10}\text{P}_4$  (1796.81): C, 65.45; H, 5.34; N, 6.23. Found (%): C, 65.12; H, 5.62; N, 6.29. HRMS (ESI):  $m/z$  calculated for  $[\text{Cu}_2(\text{PPh}_3)_2(\text{DC-OD})]^+$ : 1083.27; found 1083.26. IR (KBr  $\nu/\text{cm}^{-1}$ ): 3437 w, 3053 w, 1594 vs, 1480 s, 1436 vs, 1321 m, 1228 w, 1162 vs, 1095 s, 998 w, 809 m, 744 s, 695 vs, 519 vs, 424 w.

### Crystallographic analysis

Single-crystal data of **DC-OD-Cu** were collected on a Rigaku SuperNova diffractometer equipped with Cu K $\alpha$  radiation (1.54178  $\text{\AA}$ ) at 100 K. The structure was solved by direct methods and refined with the full matrix least squares methods on  $F^2$  with the SHELXT-2015<sup>1</sup> and SHELXL-2018<sup>2</sup> programs. All non-hydrogen atoms were refined with anisotropic displacement coefficients, and all hydrogen atoms were generated geometrically. The detailed crystallographic data and structure refinement parameters are summarized in Table S1. Selected bond lengths and angles for **DC-OD-Cu** are provided in Table S2. Crystallographic data for the structural analyses have been deposited at the Cambridge Crystallographic Data Centre (CCDC reference number: 2191945).

### Detection of extracellular ROS

Hydroxyl radicals were detected firstly through the UV-vis absorption spectra of methylene blue (MB) at 665 nm. Briefly, 22.5  $\mu\text{L}$  **DC-OD-Cu** (2.0 mM, DMF), 90.0  $\mu\text{L}$   $\text{H}_2\text{O}_2$  (2 mM) and 60.0  $\mu\text{L}$  MB (2 mM) was added to PBS (0.2 M, pH = 7.4) maintain a total volume of 3.0 mL, which was incubated in dark at 37  $^\circ\text{C}$  water bath. Additionally, the radical scavenger 5,5-Dimethyl-1-pyrroline N-oxide (DMPO) was used to detect the production of  $\bullet\text{OH}$  radicals *in vitro* with EPR spectroscopy. A mixed solution containing

**DC-OD-Cu** solution (50  $\mu\text{M}$ ),  $\text{H}_2\text{O}_2$  (1 mM), and DMPO (25 mM) was formed quickly. Immediately, the solution was transferred to a quartz capillary tube and EPR signals were recorded at room temperature. A mixed solution of the same concentration of  $\text{H}_2\text{O}_2$  and DMPO was measured as a control to test the EPR signal under the same conditions. On the other hand, the production of  $^1\text{O}_2$  was detected using SOSG probe upon white LED light (400-700 nm, 20  $\text{mW}/\text{cm}^2$ ) irradiation. Typically, 25  $\mu\text{M}$  **DC-OD-Cu** and 25  $\mu\text{M}$  SOSG were mixed in PBS (0.2 M, pH = 7.4), and then the fluorescence intensity at 535 nm was recorded with light duration. Meanwhile, the EPR spectroscopy measurements were carried out on a Bruker Model A300 spectrometer at 298 K after mixing **DC-OD-Cu** (25  $\mu\text{M}$ ) and TEMP (50  $\mu\text{M}$ ) under white LED light.

#### **Cytotoxicity of DC-OD-Cu by MTT Assay**

HeLa cells were seeded in 96-well plates ( $10^4$  cells per well) in 5 %  $\text{CO}_2$  at 37  $^\circ\text{C}$  atmosphere for 24 h in dark, then, cells were per-incubated with or without  $\text{H}_2\text{O}_2$  (100 mM) for 2 h. After discarding the  $\text{H}_2\text{O}_2$ -containing medium, fresh cell culture medium containing different concentrations of **DC-OD-Cu** (0, 1.0, 2.0, 4.0 and 6.0  $\mu\text{M}$ , PBS, 7.4) was added to each well for 6 h incubation. Subsequently, the cells were irradiated with/without white LED light (20 min, 400-700 nm, 20  $\text{mW}/\text{cm}^2$ ) and further cultured for another 42 h. Lastly, 20  $\mu\text{L}$  of standard 3-(4,5-dimethylthiazol-2-yl)-2,5-diphenyltetrazolium bromide (MTT) solution (5 mg/mL) was added into each well and further incubated for 4 h. Afterwards, discard the medium and 100  $\mu\text{L}$  DMSO was added into every well to dissolve formed formazan crystals. Absorbance at 570 nm of each well was measured on an enzyme-labeling instrument and the data was recorded using SPSS software. Experiments were performed 3 times as a parallel test.

#### **Cellular ROS Generation by DC-OD-Cu**

DCFH-DA was used for monitoring intracellular ROS generation. Briefly, the HeLa cells were planted into confocal dishes at a density of  $1 \times 10^5$  cells/dish and incubated overnight at 37  $^\circ\text{C}$  in a humidified atmosphere containing 5 %  $\text{CO}_2$  in dark. Afterwards, the cells were pre-cultured for another 1 h in the presence or absence of fresh 1640 medium containing 100  $\mu\text{M}$   $\text{H}_2\text{O}_2$ . Then, the cells were incubated with **DC-OD-Cu** (2.0  $\mu\text{M}$ ) for 4 h, or irradiated with white LED light (20 min, 400-700 nm, 20  $\text{mW}/\text{cm}^2$ ), and then incubated for 4 h. Finally, the level of intracellular ROS was detected by Two-photon Confocal Scanning Laser Microscope photon (Leica TCS SP8 DIVE, GER) after 20 min incubation with DCFH-DA.

#### **Cell uptake assay**

HeLa cells (approximately  $5 \times 10^5$  cells per mL) were seeded in 10 cm culture dishes and incubated overnight. Then the cells were treated with **DC-OD-Cu** (1.0  $\mu\text{M}$ ) for 2 h, 4 h, 6 h, 8 h and 10 h respectively. Then, the culture medium containing the **DC-OD-Cu** was removed, washed three times with PBS to completely remove residual **DC-OD-Cu**, and the cells were then digested with trypsin and counted. For whole cell copper measurement, the HeLa cells were digested and collected directly. For mitochondria copper measurements, the mitochondria of cells were extracted and collected by centrifugation using the Cell Mitochondria Isolation Kit (Beyotime BioTECH Shanghai, China). All samples were digested in  $\text{HNO}_3$  (65 %, 300  $\mu\text{L}$ )/ $\text{H}_2\text{O}_2$  (30 %, 100  $\mu\text{L}$ ) at room temperature and quantified by ICP-MS analysis.

#### **Cell apoptosis and live/dead assay**

HeLa cells were seeded with  $5 \times 10^4$  cells per well in a 6-well plate and incubated 24 h in dark, followed by per-incubation with or without  $\text{H}_2\text{O}_2$  (100 mM) for 2 h. Then, discard the  $\text{H}_2\text{O}_2$ -containing medium, HeLa cells were treated in a medium containing **DC-OD-Cu** (5.0  $\mu\text{M}$ ) for 6 h in dark. Subsequently, cells were washed twice with PBS. After replacing with fresh medium further for irradiation by a white LED light (0 or 20 min, 400-700 nm, 20  $\text{mW}/\text{cm}^2$ ), the cells were cultured for another 30 min. Additionally, the cells were washed twice with PBS, collected by trypsin solution and washed twice with ice-cold PBS. Finally, the gathered cells were stained with Annexin V-FITC/PI staining solution for 20 min under dark environment and then analysed by flow cytometry (FACS Aria II flow cytometry, BD Biosciences, San Jose, USA). The data were processed and analysed by FlowJo 7.6 software. For live/dead staining assay, follow the above steps exactly, just

change the dye to Calcein-AM (2  $\mu\text{g}/\text{mL}$ ) and PI (5  $\mu\text{g}/\text{mL}$ ) to each well for 20 min incubation. After multiple rinses with PBS, the dead and living cells were detected on Cell Imaging Multi-Mode Reader System (BioTek, citation 5, USA).

#### Mitochondrial membrane potential assay

HeLa cells were seeded with  $5 \times 10^4$  cells per well in a 6-well plate and incubated 24 h in dark, followed by pre-incubation with or without  $\text{H}_2\text{O}_2$  (100 mM) for 2 h. Then, discard the  $\text{H}_2\text{O}_2$ -containing medium, HeLa cells were treated in a medium containing **DC-OD-Cu** (5.0  $\mu\text{M}$ ) for 6 h in dark. Then the cells were washed twice with PBS. After replacing with fresh medium further for irradiated with/without a white LED light (20 min, 400-700 nm, 20  $\text{mW}/\text{cm}^2$ ), the cells were cultured for another 30 min. Afterward, the cells were washed twice with PBS, followed by addition of JC-1 (5  $\mu\text{g}/\text{mL}$ ) staining dye. After 20 minutes incubation, the culture medium of all samples was removed and the cells were washed twice by PBS, and re-suspended in PBS for immediate flow cytometry analysis.

#### Animal Experiments

Animal experiments were consigned to Nanjing OG Science and Technology Service Co., Ltd. BALB/c nude mice (about 6 weeks aged) were purchased from Changzhou Cavens Laboratory Animal Co., Ltd. (Changzhou, China, approval No. SCXK 2021-0013). All animal experiment procedures were conducted in accordance with the NIH Guidelines for the Care and Use of Laboratory Animals and all *in vivo* experiments were approved by Nanjing Lambda Pharmaceutical Co., Ltd. (Nanjing, China, Approval No. SYXK 2017-0040). HeLa cells ( $5 \times 10^6$ ) were subcutaneous injected into the nude mice. When the tumor volume reached about 100  $\text{mm}^3$ , the tumor-bearing mice were divided into four groups and, respectively, treated with (1) intratumoral injection of saline (0.9 %) at days 1, 3, 5, 7, 9, 11, and 13; (2) 450 nm white LED irradiation for 15 min every 12 h after intratumoral injection of saline (0.9 %) at days 1, 3, 5, 7, 9, 11, and 13; (3) intratumoral injection of **DC-OD-Cu** (30  $\text{mg}/\text{kg}$ ) at days 1, 3, 5, 7, 9, 11, and 13; and (4) 450 nm LED irradiation for 15 min every 12 h after intratumoral injection of **DC-OD-Cu** (30  $\text{mg}/\text{kg}$ ) at days 1, 3, 5, 7, 9, 11, and 13 (20  $\text{mW}/\text{cm}^2$ ). The tumor volume and body weight of each mouse were carefully measured every other day. The tumor volume was calculated using the formula  $V = LW^2/2$ , where L and W stand for the maximum and minimum diameter of the tumors, respectively. On day 15, all mice were sacrificed.

#### Statistical Analyses

All data are present as means  $\pm$  standard deviation (SD). Statistical analysis was evaluated using Student's t test and  $P$  value  $< 0.05$  was considered with statistically significant difference. A  $p$ -value less than 0.05 was regarded statistically significant ( $*P < 0.05$ ,  $**P < 0.01$ , and  $***P < 0.001$ ).

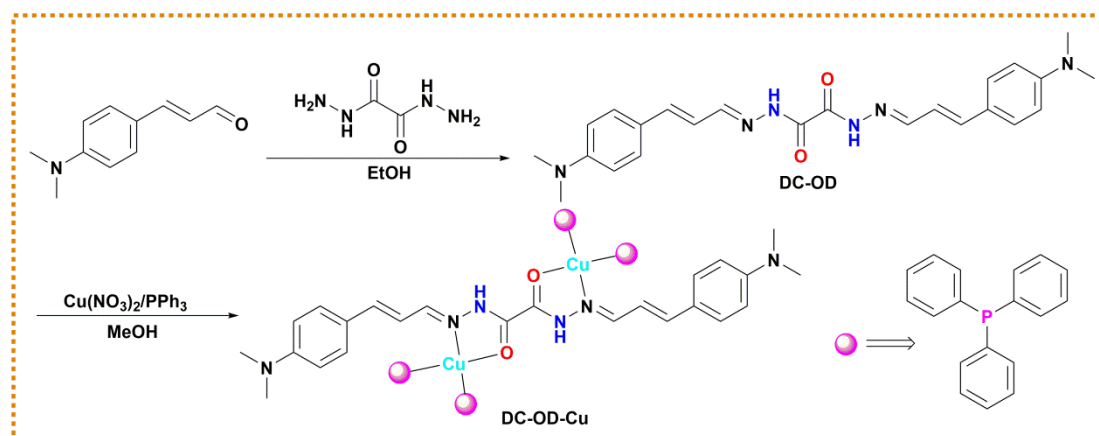

Scheme S1. Synthetic routes of DC-OD and DC-OD-Cu.

**Table S1.** Crystal data and structure refinement of **DC-OD-Cu**.

| Complex                                                   | <b>DC-OD-Cu</b>                                                                               |
|-----------------------------------------------------------|-----------------------------------------------------------------------------------------------|
| Empirical formula                                         | C <sub>98</sub> H <sub>96</sub> Cu <sub>2</sub> N <sub>8</sub> O <sub>10</sub> P <sub>4</sub> |
| Formula weight                                            | 1769.79                                                                                       |
| Crystal system                                            | Monoclinic                                                                                    |
| Space group                                               | P21/ <i>n</i>                                                                                 |
| <i>a</i> (Å)                                              | 14.2262 (1)                                                                                   |
| <i>b</i> (Å)                                              | 21.2688 (1)                                                                                   |
| <i>c</i> (Å)                                              | 15.1530 (1)                                                                                   |
| $\alpha$ (°)                                              | 90.00                                                                                         |
| $\beta$ (°)                                               | 103.775 (1)                                                                                   |
| $\gamma$ (°)                                              | 90.00                                                                                         |
| Volume (Å <sup>3</sup> )                                  | 4453.04 (5)                                                                                   |
| <i>Z</i>                                                  | 2                                                                                             |
| <i>D</i> <sub>calc</sub> (g cm <sup>-3</sup> )            | 1.340                                                                                         |
| <i>F</i> (000)                                            | 1876                                                                                          |
| Reflections collected                                     | 44875                                                                                         |
| Independent reflections                                   | 9374                                                                                          |
| <i>R</i> <sub>int</sub>                                   | 0.030                                                                                         |
| Goodness-of-fit<br>on <i>F</i> <sup>2</sup>               | 1.04                                                                                          |
| <i>R</i> <sub>1</sub> , <i>wR</i> <sub>2</sub>            | 0.0519, 0.1443                                                                                |
| [ <i>I</i> ≥ 2σ( <i>I</i> )]                              |                                                                                               |
| <i>R</i> <sub>1</sub> , <i>wR</i> <sub>2</sub> [all data] | 0.0541, 0.1462                                                                                |

**Table S2.** Selected bond lengths (Å) and angles (°) for **DC-OD-Cu**.

| <b>DC-OD-Cu</b> |             |           |            |
|-----------------|-------------|-----------|------------|
| Cu1—P1          | 2.2540 (6)  | Cu1—P2    | 2.2323 (6) |
| Cu1—O1          | 2.1823 (16) | Cu1—N2    | 2.061 (2)  |
| P2—Cu1—P1       | 119.14 (2)  | N2—Cu1—P1 | 110.38 (6) |
| O1—Cu1—P1       | 109.86 (5)  | N2—Cu1—P2 | 121.26 (6) |
| O1—Cu1—P2       | 110.39 (5)  | N2—Cu1—O1 | 77.90 (7)  |

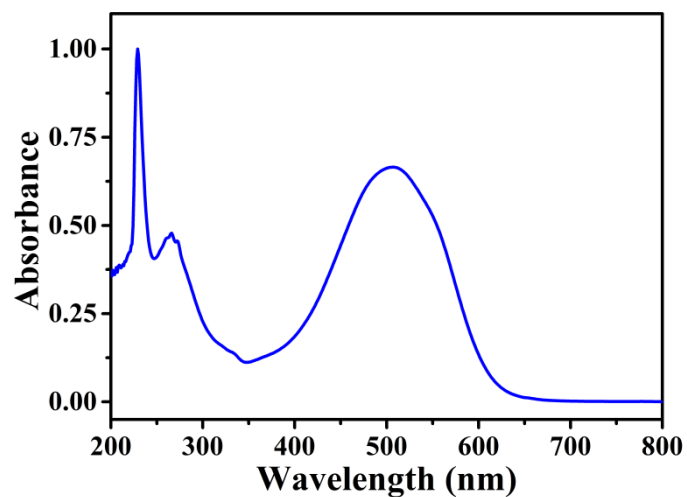

**Figure S1.** UV-vis absorption spectra of DC-OD-Cu ( $5 \times 10^{-5}$  M) in dichloromethane at room temperature.

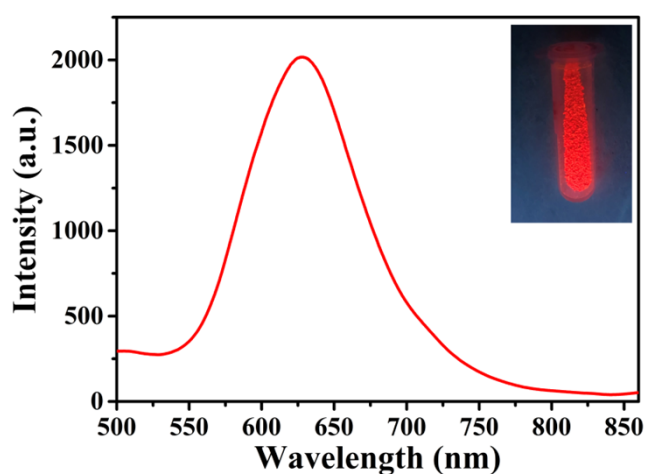

**Figure S2.** Emission spectra ( $\lambda_{\text{ex}} = 450$  nm) of DC-OD-Cu in the solid state at room temperature.

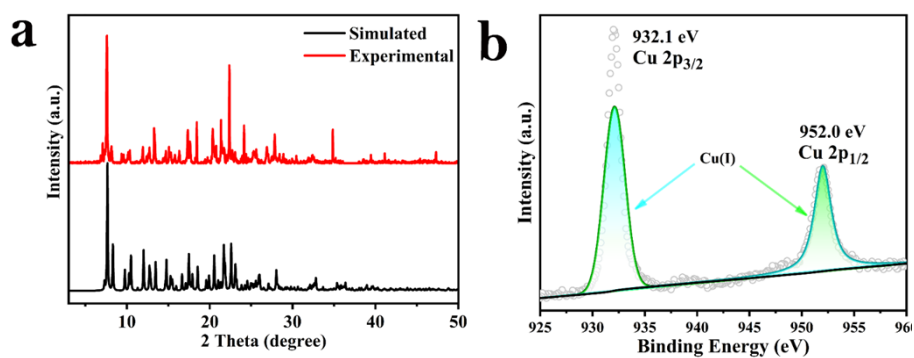

**Figure S3.** XRD and XPS spectra of DC-OD-Cu.

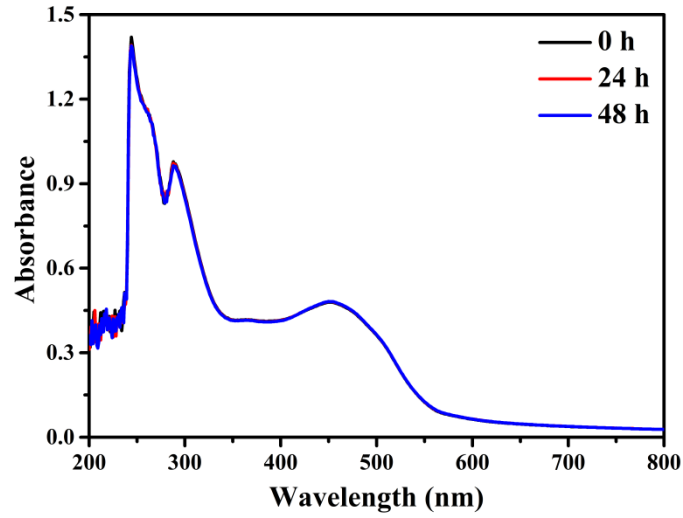

Figure S4. The absorption spectra of DC-OD-Cu in RPMI 1640 culture medium over 48 h.

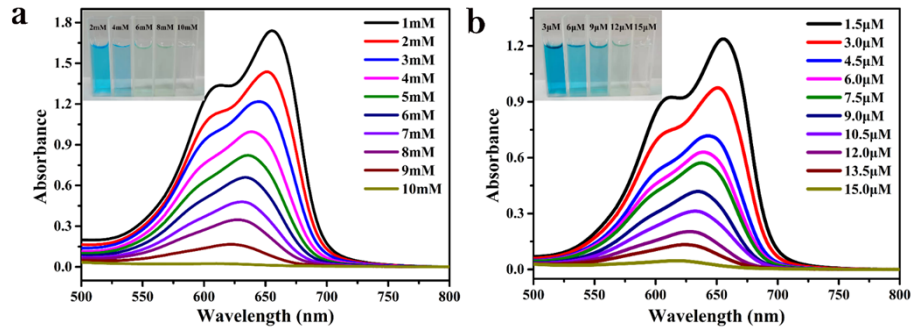

Figure S5. UV-vis absorption spectra of MB degradation after treated at different concentration of  $H_2O_2$  (a, MB: 20  $\mu$ M, DC-OD-Cu: 20  $\mu$ M) and DC-OD-Cu (b, MB: 20  $\mu$ M,  $H_2O_2$ : 10 mM) in Tris-HCl buffer (0.05 M, pH=7.4).

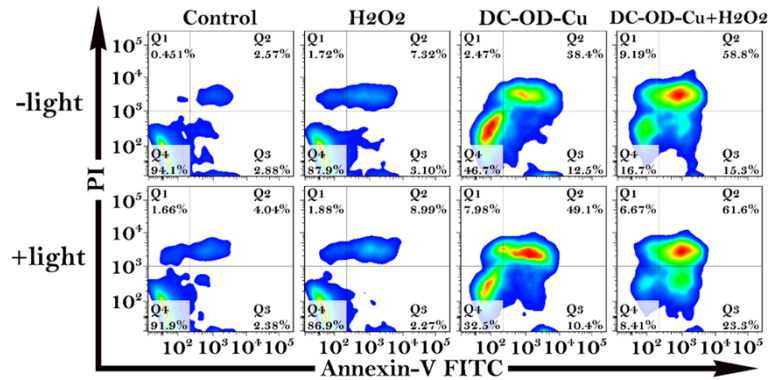

Figure S6. Flow cytometry analysis of HeLa cell apoptosis after different treatment for 48 h.

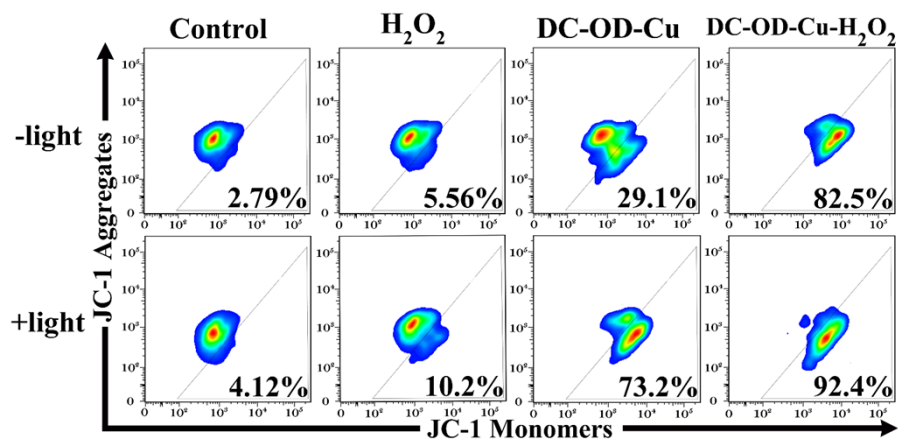

**Figure S7.** Measurement of mitochondrial membrane potential by flow cytometry in HeLa cells after different treatments.

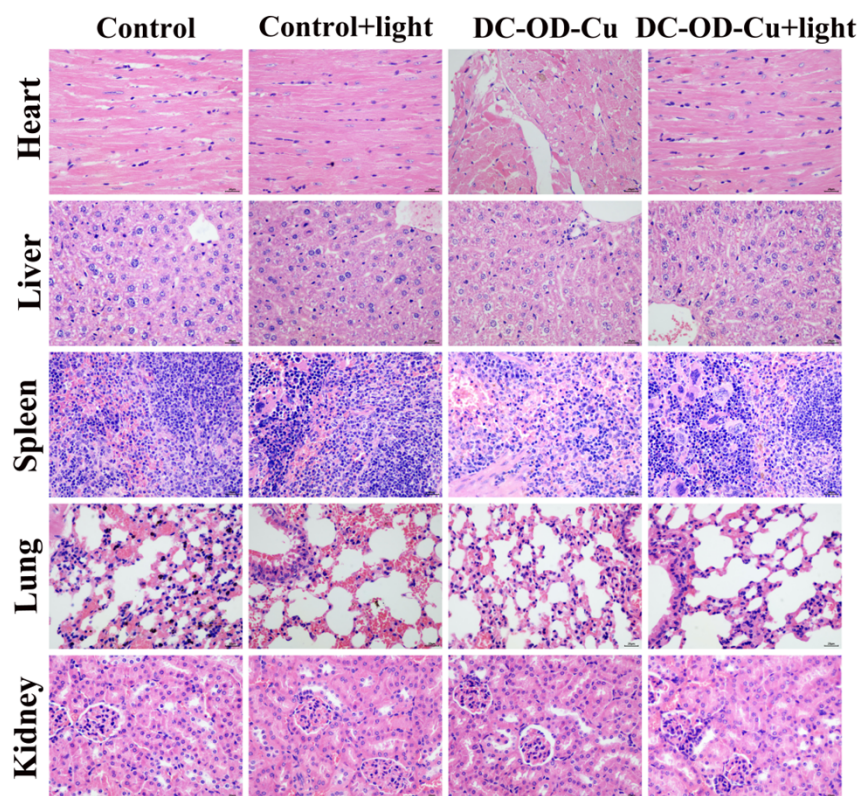

**Figure S8.** Histopathological analysis results (H&E staining images) of the major organs, heart, liver, spleen, lung and kidneys, of mice that were exposed to different treatments. Scale bar: 20 μm.



## References

- 1 G.M. Sheldrick, *Acta Crystallogr. Sect. A: Found. Adv.*, 2015, **A71**, 3–8.
- 2 G.M. Sheldrick, *Acta Crystallogr. Sect. C: Struct. Chem.*, 2015, **C71**, 3–8.
